# Supplementary material for: Antiangiogenic Activity and Pharmacogenomics of Medicinal Plants from Traditional Korean Medicine
Source: PubMed Central journal article supplement (PMC3736538; doi:10.1155/2013/131306), 2013-07-22
Supplement: 131306.f1.pdf [file 131306.f1.pdf]

# Anti-angiogenic activity and pharmacogenomics of medicinal plants from traditional Korean medicine

Ean-Jeong Seo\*, Victor Kuete\*, Onat Kadioglu, Benjamin Krusche, Mira Oswald, Sven Schröder, Henry Johannes Greten, Joachim Arend, Ik-Soo Lee, Thomas Efferth

-----

**Supplementary Table: Genes involved in angiogenesis** (taken from: Peale Jr FV, Gerritsen ME. Gene profiling techniques and their application in angiogenesis and vascular development. J Pathol 2001; 195: 7–19.

| Gene Symbol   | Pattern ID | Genbank Accession | Gene Name                                                                                   |
|---------------|------------|-------------------|---------------------------------------------------------------------------------------------|
| <i>TIMP3</i>  | GC19231    | AA043969          | Tissue inhibitor of metalloproteinase 3 (Sorsby fundus dystrophy, pseudo-inflammatory)      |
| <i>THBS4</i>  | GC15218    | N80868            | Thrombospondin 4                                                                            |
| <i>HGF</i>    | GC14697    | N62083            | Hepatocyte growth factor (hepapoietin A; scatter factor)                                    |
| <i>HGF</i>    | GC17092    | AA037786          | Hepatocyte growth factor (hepapoietin A; scatter factor)                                    |
| <i>THBS1</i>  | GC10044    | AA056585          | Thrombospondin 1                                                                            |
| <i>ACTG2</i>  | GC9740     | AA053297          | actin, $\gamma$ 2, smooth muscle, enteric                                                   |
| <i>AXL</i>    | GC11900    | T91043            | AXL receptor tyrosine kinase                                                                |
| <i>FGFR2</i>  | GC10638    | R38513            | Fibroblast growth factor receptor 2                                                         |
| <i>FGFR2</i>  | GC17772    | W87790            | Fibroblast growth factor receptor 2                                                         |
| <i>TIMP2</i>  | GC15806    | W49722            | Tissue inhibitor of metalloproteinase 2                                                     |
| <i>EphA2</i>  | GC17968    | AA001368          | Ephrin A2                                                                                   |
| <i>SST</i>    | GC16150    | W72209            | Somatostatin                                                                                |
| <i>TEK</i>    | GC12925    | H44411            | TEK tyrosine kinase, endothelial (venous malformations, multiple cutaneous and mucosal)     |
| <i>BMB6</i>   | GC12254    | R27799            | Bone morphogenetic protein 6                                                                |
| <i>TGFB2</i>  | GC14551    | N48082            | Transforming growth factor, $\beta$ 2                                                       |
| <i>NOS2A</i>  | GC13640    | H67843            | Nitric oxide synthase 2A                                                                    |
| <i>VEGF</i>   | GC15550    | W19225            | Vascular endothelial growth factor                                                          |
| <i>VEGF</i>   | GC9897     | AA045836          | Vascular endothelial growth factor                                                          |
| <i>NOS3</i>   | GC12213    | R21248            | Nitric oxide synthase 3                                                                     |
| <i>FGFR1</i>  | GC10555    | T66144            | Fibroblast growth factor receptor (fms-related tyrosine kinase 2, Pfeiffer syndrome)        |
| <i>FGFR1</i>  | GC12641    | R54846            | Fibroblast growth factor receptor (fms-related tyrosine kinase 2, Pfeiffer syndrome)        |
| <i>CD44</i>   | GC11989    | T91563            | CD44 antigen (homing function and Indian blood group system)                                |
| <i>SSP1</i>   | GC13722    | H93048            | Secreted phosphoprotein 1 (osteopontin, bone sialoprotein, early T-lymphocyte activation 1) |
| <i>SSP1</i>   | GC16786    | AA021512          | Secreted phosphoprotein 1 (osteopontin, bone sialoprotein, early T-lymphocyte activation 1) |
| <i>SELE</i>   | GC12936    | H39991            | Selectin E (endothelial adhesion molecule 1)                                                |
| <i>FN1</i>    | GC12293    | R36451            | Fibronectin 1                                                                               |
| <i>FN1</i>    | GC12570    | H03907            | Fibronectin 1                                                                               |
| <i>FN1</i>    | GC15675    | W15432            | Fibronectin 1                                                                               |
| <i>FN1</i>    | GC10483    | AA057805          | Fibronectin 1                                                                               |
| <i>MMP9</i>   | GC11583    | T41204            | Matrix metalloproteinase 9 (gelatinase B, 92kDa type IV collagenase)                        |
| <i>COL1A2</i> | GC10023    | AA056542          | Collagen, type I, $\alpha$ 2                                                                |
| <i>COL3A1</i> | GC9808     | AA044829          | collagen, type III, $\alpha$ 1 (Ehlers-Danlos syndrome type IV, autosomal dominant)         |
| <i>EFEMP1</i> | GC18383    | AA030000          | EGF-containing fibulin-like extracellular matrix protein 1                                  |
| <i>EFEMP1</i> | GC18944    | AA040443          | EGF-containing fibulin-like extracellular matrix protein 1                                  |
| <i>MPDZ</i>   | GC14622    | N71935            | Multiple PDZ domain protein                                                                 |
| <i>ARG2</i>   | GC13080    | R94927            | Arginase, type II                                                                           |
| <i>TRB</i>    | GC15271    | N79985            | T-cell receptor $\beta$ locus                                                               |
| <i>PLAT</i>   | GC17776    | W89129            | Plasminogen activator, tissue                                                               |

|          |         |          |                                                                                                  |
|----------|---------|----------|--------------------------------------------------------------------------------------------------|
| ADM      | GC16644 | AA017304 | Adrenomedullin                                                                                   |
| PIN      | GC18907 | AA040248 | Dynein, cytoplasmic, light polypeptide                                                           |
| C1QR1    | GC19150 | AA044236 | Complement component 1, q subcomponent, receptor 1                                               |
| IL8      | GC15899 | W45324   | Interleukin 8                                                                                    |
| COL1A1   | GC17894 | W90360   | Collagen, type I, $\alpha$ 1                                                                     |
| MMRN     | GC16095 | W73053   | Multimerin                                                                                       |
| F3       | GC12286 | R34833   | Coagulation factor III (thromboplastin, tissue factor)                                           |
| SPARCL1  | GC18568 | AA033762 | SPARC.like 1 (mast9, hevin)                                                                      |
| CTGF     | GC19343 | AA044993 | Connective tissue growth factor                                                                  |
| COL4A2   | GC10048 | AA056692 | Collagen, type IV, $\alpha$ 2                                                                    |
| MGP      | GC16120 | W72057   | Matrix Gly protein                                                                               |
| CHD5     | GC13933 | N22448   | Cadherin 5, type 2, VE-cadherin (vascular epithelium)                                            |
| NRCAM    | GC10822 | R45583   | Neuronal cell adhesion molecule                                                                  |
| NRCAM    | GC14758 | N59824   | Neuronal cell adhesion molecule                                                                  |
| PLAU     | GC19033 | AA040727 | Plas minogen activator, urokinase                                                                |
| TFPI2    | GC16650 | AA017446 | Tissue factor pathway inhibitor 2                                                                |
| TFPI2    | GC18167 | AA011474 | Tissue factor pathway inhibitor 2                                                                |
| PECAM1   | GC11837 | T72992   | Platelet/endothelial cell adhesion molecule (CD31 antigen)                                       |
| PECAM1   | GC10029 | AA056412 | Platelet/endothelial cell adhesion molecule (CD31 antigen)                                       |
| ANGPTL2  | GC16029 | W73148   | Angiopietin-like 2                                                                               |
| IL6ST    | GC13860 | H85457   | Interleukin 6 signal transducer (gp130, oncostatin M receptor)                                   |
| HPN      | GC13241 | GC13241  | Hepsin (transmembrane protease, seine 1)                                                         |
| COL18A1  | GC16530 | AA009987 | Collagen, type XV, $\alpha$ 1                                                                    |
| SNX17    | GC10384 | AA053676 | Sorting nexin 17                                                                                 |
| MDK      | GC16107 | W72586   | Midkine (neurite growth-promoting factor 2)                                                      |
| SERPINE1 | GC19310 | AA046659 | Serine (or cys) proteinase inhibitor, clase E (nexin, plasminogen activator inhibitor type 1), 1 |
| MMP11    | GC18601 | AA034203 | Matrix metalloproteinase 1 (stromelysin 3)                                                       |
| MMP11    | GC15801 | W49497   | Matrix metalloproteinase 1 (interstitial collagenase)                                            |
| FST      | GC12080 | R01927   | Follistatin                                                                                      |
| DDAH2    | GC15208 | N81116   | Dimethylarginine dimethylaminohydolase 2                                                         |
| CD34     | GC13318 | H72113   | CD34 antigen                                                                                     |
| NOTCH3   | GC18151 | AA007598 | Notch homologue 3 ( <i>Drosophila</i> )                                                          |
| CYR61    | GC19161 | AA044574 | Cystene-rich, angiogenic inducer, 61                                                             |
| PML      | GC12650 | R55296   | Promyelocytic leukemia                                                                           |
| PML      | GC15315 | N93133   | Promyelocytic leukemia                                                                           |
| PML      | GC17137 | AA039542 | Promyelocytic leukemia                                                                           |
| MMP2     | GC12462 | R79223   | Matrix metalloproteinase 2 (gelatinase A, 72kDa type IV collagenase)                             |
| NOTCH4   | GC16035 | W74767   | Notch homologue 4 ( <i>Drosophila</i> )                                                          |
| C6orf9   | GC11019 | R59617   | Chromosome 6 open reading frame 9                                                                |
| BST2     | GC12646 | R54976   | Bone marrow stromal cell antigen 2                                                               |
| ITGA5    | GC16514 | W92322   | Integrin, $\alpha$ 5 (fibronectin receptor, $\alpha$ polypeptide)                                |
| THY1     | GC12929 | H28104   | Thy-1 cell surface antigen                                                                       |
| THY1     | GC18445 | AA031264 | Thy-1 cell surface antigen                                                                       |
| BMP1     | GC12413 | R71212   | Bone morphognetic protein 1                                                                      |
| BMP1     | GC17017 | AA029677 | Bone morphognetic protein 1                                                                      |
| M11S1    | GC16436 | W94794   | Membrane compenent, chromosome 11, surface marker 1                                              |
| COL5A1   | GC18776 | AA037002 | Collagen, type V, $\alpha$ 1                                                                     |
| BMP2R    | GC13867 | H96519   | Bone morphognetic protein receptor, type II (serine/threonine kinase)                            |
| INHBA    | GC14152 | N27159   | inhibin, $\beta$ A (activin AB a polypeptide)                                                    |
| GJA4     | GC15957 | W69079   | Gap junction protein, $\alpha$ 4, 37kDa (connexin 37)                                            |
| DVL3     | GC16240 | W79440   | Dishevelled, dsh homologue 3 ( <i>Drosophila</i> )                                               |
| DVL3     | GC19142 | AA044175 | Dishevelled, dsh homologue 3 ( <i>Drosophila</i> )                                               |
| STC1     | GC12616 | R48580   | Stanniocalcin 1                                                                                  |
| ABCG1    | GC13298 | H68928   | ATP-binding cassette, subfamily G (WHITE), member 1                                              |
| TGFB1    | GC12433 | R76212   | Transforming growth factor $\beta$ 1                                                             |
| FGF2     | GC15733 | W44678   | Fibroblast growth factor 2 (basic)                                                               |
| FGF2     | GC15826 | W52295   | Fibroblast growth factor 2 (basic)                                                               |
| FGFR2    | GC10638 | R38513   | Fibroblast growth factor receptor 2                                                              |
| FGFR2    | GC17772 | W87790   | Fibroblast growth factor receptor 2                                                              |
| EDG1     | GC15407 | N93476   | Endothelial differentiation, spingolipid G-protein-coupled receptor 1                            |
| CXCR4    | GC12441 | R78620   | Chemokine (C-X-C motif), receptor 4 (fusin)                                                      |
| NID2     | GC16008 | W70102   | Nidogen 2                                                                                        |
| PGF      | GC18503 | AA031377 | Placental grow th factor, vascular endothelial growth factor-related protein                     |

|                |         |          |                                                                                                          |
|----------------|---------|----------|----------------------------------------------------------------------------------------------------------|
| <i>MCAM</i>    | GC12722 | H28333   | Melanoma cell adhesion molecule                                                                          |
| <i>MCAM</i>    | GC19206 | AA042901 | Melanoma cell adhesion molecule                                                                          |
| <i>SPR</i>     | GC16989 | AA026314 | Sepiapterin reductase (7,8-dihydrobiopterin:NADP <sup>+</sup> oxidoreductase)                            |
| <i>VEGFB</i>   | GC18978 | AA040199 | Vascular endothelial growth factor B                                                                     |
| <i>VEGFC</i>   | GC15494 | N94399   | Vascular endothelial growth factor C                                                                     |
| <i>FLT1</i>    | GC14477 | N47214   | Fms-related tyrosine kinase 1 (vascular endothelial growth factor/vascular permeability factor receptor) |
| <i>ANGPTL3</i> | GC11804 | T73442   | Angiopoietin-like 3                                                                                      |
| <i>HIF1A</i>   | GC15805 | W47003   | Hypoxia-inducible factor 1, $\alpha$ subunit (basic helix-loop-helix transcription factor)               |
| <i>ANG</i>     | GC18183 | AA011614 | Angiogenin, ribonuclease, RNase A family, 5                                                              |
